# Pacing-Induced Regional Differences in Adenosine Receptors mRNA Expression in a Swine Model of Dilated Cardiomyopathy

Silvia Del Ry<sup>1\*</sup>, Manuela Cabiati<sup>1</sup>, Vincenzo Lionetti<sup>2</sup>, Giovanni D. Aquaro<sup>3</sup>, Alessandro Martino<sup>4</sup>, Letizia Mattii<sup>5</sup>, Maria-Aurora Morales<sup>1</sup>

**1** Institute of Clinical Physiology, CNR, Pisa, Italy, **2** Institute for Life Sciences, Laboratory of Medical Sciences, Scuola Superiore Sant'Anna, Pisa, Italy, **3** Fondazione CNR-Regione Toscana "G. Monasterio", MRI Lab, Pisa, Italy, **4** Department of Biology, Genetics Division, University of Pisa, Pisa, Italy, **5** Department of Human Morphology and Applied Biology, Medical Histology and Embryology Section, University of Pisa, Pisa, Italy

## Abstract

The adenosinergic system is essential in the mediation of intrinsic protection and myocardial resistance to insult; it may be considered a cardioprotective molecule and adenosine receptors (ARs) represent potential therapeutic targets in the setting of heart failure (HF). The aim of the study was to test whether differences exist between mRNA expression of ARs in the anterior left ventricle (LV) wall (pacing site: PS) compared to the infero septal wall (opposite region: OS) in an experimental model of dilated cardiomyopathy. Cardiac tissue was collected from LV PS and OS of adult male minipigs with pacing-induced HF (n = 10) and from a control group (C, n = 4). ARs and TNF- $\alpha$  mRNA expression was measured by Real Time-PCR and the results were normalized with the three most stably expressed genes (GAPDH, HPRT1, TBP). Immunohistochemistry analysis was also performed. After 3 weeks of pacing higher levels of expression for each analyzed AR were observed in PS except for A<sub>1</sub>R (A<sub>1</sub>R: C = 0.6 $\pm$ 0.2, PS = 0.1 $\pm$ 0.04, OS = 0.04 $\pm$ 0.01, p < 0.0001 C vs. PS and OS respectively; A<sub>2A</sub>R: C = 1.04 $\pm$ 0.59, PS = 2.62 $\pm$ 0.79, OS = 2.99 $\pm$ 0.79; A<sub>2B</sub>R: C = 1.2 $\pm$ 0.1, PS = 5.59 $\pm$ 2.3, OS = 1.59 $\pm$ 0.46; A<sub>3</sub>R: C = 0.76 $\pm$ 0.18, PS = 8.40 $\pm$ 3.38, OS = 4.40 $\pm$ 0.83). Significant contractile impairment and myocardial hypoperfusion were observed at PS after three weeks of pacing as compared to OS. TNF- $\alpha$  mRNA expression resulted similar in PS (6.3 $\pm$ 2.4) and in OS (5.9 $\pm$ 2.7) although higher than in control group (3.4 $\pm$ 1.5). ARs expression was mainly detected in cardiomyocytes. This study provided new information on ARs local changes in the setting of LV dysfunction and on the role of these receptors in relation to pacing-induced abnormalities of myocardial perfusion and contraction. These results suggest a possible therapeutic role of adenosine in patients with HF and dyssynchronous LV contraction.

**Citation:** Del Ry S, Cabiati M, Lionetti V, Aquaro GD, Martino A, et al. (2012) Pacing-Induced Regional Differences in Adenosine Receptors mRNA Expression in a Swine Model of Dilated Cardiomyopathy. PLoS ONE 7(10): e47011. doi:10.1371/journal.pone.0047011

**Editor:** Rajesh Gopalrao Katare, University of Otago, New Zealand

**Received:** June 26, 2012; **Accepted:** September 11, 2012; **Published:** October 12, 2012

**Copyright:** © 2012 Del Ry et al. This is an open-access article distributed under the terms of the Creative Commons Attribution License, which permits unrestricted use, distribution, and reproduction in any medium, provided the original author and source are credited.

**Funding:** No current external funding sources for this study.

**Competing Interests:** The authors have declared that no competing interests exist.

\* E-mail: delry@ifc.cnr.it

## Introduction

Adenosine derives from ATP degradation; it is considered to play an important role in adaptation to inadequate oxygen supply since it accumulates under hypoxic or ischemic conditions [1–3]. Adenosine concentration measurement is known to be technically difficult since it is rapidly degraded into inosine. Basal adenosine levels reported in myocardial interstitial fluid range from nano- to micromolar concentrations; maximal ATP-derived adenosine production might reach 100 nmol adenosine/(h.heart) in the case of oxygen shortage [4,5]. The diverse cellular actions of adenosine are mediated by a family of adenosine receptors (ARs); four subtypes (A<sub>1</sub>R, A<sub>2A</sub>R, A<sub>2B</sub>R and A<sub>3</sub>) have been cloned and pharmacologically characterized [6,7].

Evidence indicates that the adenosinergic system is essential in the mediation of intrinsic protection and in determining myocardial resistance to insult; therefore, adenosine may be considered as a potential cardioprotective molecule and ARs could represent potential therapeutic targets in the setting of heart failure (HF).

In a previous study, it was shown that AR subtypes are ubiquitously distributed in cardiac tissue and up-regulated in the left ventricle (LV) after 3 weeks of pacing in a model of pacing-induced HF in pigs [8].

A study carried out in our Institute demonstrated that high-frequency pacing of the LV free wall causes a dyssynchronous pattern of activation that contributes to progressive cardiac failure, with pronounced differences in regional contractility and flow but global abnormalities in myocardial metabolism [9].

Efficient LV chamber performance relies also on coordinated contraction of LV walls; a dyssynchronous pattern of activation - as observed during pacing in experimental models - contributes to progressive cardiac failure and can be related to what frequently reported in clinical practice in patients with conduction abnormalities who are more prone to develop left ventricular dysfunction [10].

The aim of the study was to test in this animal model of pacing-induced HF whether regional differences exist in ARs mRNA expression at pacing site (PS) as compared to the opposite wall

(OS) and whether these differences possibly depend on regional abnormalities of myocardial contractility and perfusion.

## Materials and Methods

### Pacing protocol and tissue collection

Cardiac tissue was collected from two different sites of the LV of male adult minipigs (weight 35–40 Kg) with pacing-induced HF ( $n = 10$ ).

Left intercostal thoracotomy was performed under general anesthesia and sterile conditions. An aortic catheter was surgically inserted in the descending aorta and an unipolar screw-type epicardial pacing lead was connected to the anterior LV free wall. A programmable pacemaker was implanted in a subcutaneous pocket. After surgery, the minipigs were allowed to fully recover for 10 days. Next, HF was induced by rapid LV pacing (180 beats/min) for 3 weeks. The cardiovascular function was monitored as previously described [9] and minipigs were considered to be in HF when the LV end-diastolic pressure was  $\geq 20$  mmHg and LV ejection fraction was  $< 25\%$ .

All animals underwent hemodynamic evaluation (heart rate, mean aortic pressure, left ventricular pressure and  $dP/dt_{max}$ ) at 10 days after surgery (baseline) and after 3 weeks of LV pacing. Global and regional myocardial contractility was assessed by magnetic resonance imaging (MRI, 1.5 Tesla) at baseline and at the end of the experimental protocol as previously described [9].

Finally the animals were deeply sedated with 3.3 mg/kg of propofol and sacrificed by injecting saturated KCl solution (10 ml). Cardiac tissue samples were collected from the anterior left ventricular wall, PS, and from the infero septal wall, (OS). The samples were immediately placed in ice-cold RNAlater and stored at  $-80^{\circ}\text{C}$ .

Cardiac tissue (left ventricular wall) was also collected from male adult minipigs without ( $n = 4$ ) pacing-induced HF as control group (C).

These procedures were approved by the Italian Ministry of Health in accordance with the Italian law (DL-116,27 January 1992), which conforms to the Guide for the Care and Use of Laboratory Animals published by the US National Institute of Health (NIH publication n° 85-23, revised 1996).

### Hemodynamic recordings

The aortic catheter was attached to a strain-gauge transducer to measure arterial pressure [9].

LV pressure and  $dP/dt_{max}$  values were measured using a calibrated pressure catheter (Millar Instruments Inc, Houston, TX, USA) inserted percutaneously into the LV cavity under fluoroscopy guidance in animals lightly sedated with continuous infusion of midazolam ( $0.1 \text{ mg}\cdot\text{kg}^{-1}\cdot\text{h}$  iv) at spontaneous breathing [11]. All analogical signals were recorded and stored in a computer memory through an analog-digital interface (National Instruments), at a sampling rate of 250 Hz for subsequent analysis.

### Cardiac MRI

As previously described, cine-MRI images were acquired with a 1.5 Tesla MRI scanner (Signa Excite HD, GE Medical Systems, Waukesha, WI, USA) in sedated animals with continuous infusion of midazolam ( $0.1 \text{ mg}\cdot\text{kg}^{-1}\cdot\text{h}$  iv) at spontaneous heart rate. Global LV parameters (end-diastolic volume, end-systolic volume and ejection fraction) were analyzed in pacing-induced HF with a commercially available research software package (Mass Analysis, Leyden, The Netherlands) [9,12–14].

Regional LV myocardial perfusion was evaluated with the first-pass MRI technique by the LV relative upslope of signal intensity

(LVRUSI, myocardial upslope divided LV cavity upslope) for each myocardial segment, obtained after a bolus injection of gadolinium-diethylenetriamine pentaacetic acid ( $0.05 \text{ mmol/Kg}$  at  $4 \text{ ml/s}$  of infusion velocity iv Gd-DTPA; Magnevist, Schering, Berlin, Germany) in a peripheral vein [9,12].

To regionally assess the presence of tissue fibrosis, gadolinium-delayed contrast-enhanced images were acquired in two-dimensional segmented inversion recovery-prepared gradient echo sequence 10 min after administration of the contrast agent Gd-DTPA ( $0.2 \text{ mmol/kg}$  iv) in short-axis views [9,12–14].

### Molecular analysis

**RNA extraction.** Total RNA was extracted by acid guanidinium thiocyanate-phenol-chloroform method from tissue samples obtained from pig hearts with the Rneasy Midi kit (Qiagen S.p.A, Milano, Italy) as previously described [8,15–17]. RNA concentration was determined spectrophotometrically (Biophotometer Eppendorf) at 260 nm. The ratio of readings at 260 nm and 280 nm ( $A_{260}/A_{280}$ ) provided an estimate of the purity of RNA. The integrity and purity of total RNA was also detected by electrophoresis of samples on ethidium bromide agarose gels. Only the samples that showed clear and distinct 28S and 18S ribosomal RNA bands and had spectrophotometric OD 260/280 ratios of 1.9–2.1 were used. A known amount of total RNA (Ambion) was used as marker. The RNA samples were stored at  $-80^{\circ}\text{C}$  for use in gene expression studies.

**Real Time quantitative RT-PCR.** Following DNase treatment, first strand cDNA was synthesized with iScript cDNA Synthesis kit (Bio-rad, Hercules, California, USA) using about  $1 \mu\text{g}$  of total RNA as template.

Real-time PCR was conducted on a 96-well iQ Cyler Real-Time PCR Detection System (Biorad, Hercules, CA, USA) in a  $25 \mu\text{l}$  final volume, using  $12.5 \mu\text{l}$  of iQ SYBR Green Supermix 2X (Biorad, Hercules, CA, USA) and  $2 \mu\text{l}$  of cDNA as template. In general, the amplification protocol started with  $95^{\circ}\text{C}/3 \text{ min}$  followed by 40 cycles of  $95^{\circ}\text{C}/15 \text{ s}$  and  $60^{\circ}\text{C}/30 \text{ s}$ . Annealing temperature varied depending on the primer pair used (Table 1). Two no template controls were used in each PCR run, while two inter-run calibrators were used to ensure the comparability of different PCR runs.

A series of PCRs was performed on cDNAs of HF pigs (PS and OS respectively) using primer pairs for  $A_1R$ ,  $A_{2A}R$ ,  $A_{2B}R$ ,  $A_3R$  and  $\text{TNF-}\alpha$ . Primer pairs were designed with Primer Express Version 2.0 (Applied Biosystems) and details are given in Table 1. Specificity of each primer pair, i.e., absence of artifacts, multiple PCR products or primer-dimers, and PCR yield were checked by agarose-gel electrophoresis and by melting analysis. All reactions were performed in triplicate.

### Immunohistochemistry analysis

Myocardial tissue samples were paraffin-embedded, cut into  $5\text{-}\mu\text{m}$ -thick sections, mounted serially on glass slides and treated for immunohistochemistry as previously described [18].

$A_3R$  expression was detected using a rabbit anti-human adenosine  $A_3R$  antibody (ADORA3, MBL International Corporation, MA, USA) diluted 1:100 in BSA-PBS. This antibody reacts with pig  $A_3R$  on paraffined sections as specified by the supplier. For each selected specimens, at least three serial sections 1/10 were examined using semi-quantitative scale of immunoreactivity: no (–), low (+), medium (++) and high (+++) staining. Negative controls were obtained by incubating the specimens with BSA-PBS, omitting the primary antibody. Representative photomicrographs were taken by a DFC480 digital camera (Leica Microsystem, Cambridge, UK).

**Table 1.** Primers pairs.

| Gene              | Primers                                                              | Annealing T° | GeneBank  |
|-------------------|----------------------------------------------------------------------|--------------|-----------|
| A <sub>1</sub> R  | 5'- ATCAGGTTACTTGGTTCT -3'<br>5'- ATCAGGTTACTTGGTTCT -3'             | 57°          | AY772411  |
| A <sub>2A</sub> R | 5'- GATCAGCCTCCGCCTCAACGGCCA -3'<br>5'- TCAGGACACTCCTGCTGTCTGCTG -3' | 60.5°        | AY772412  |
| A <sub>2B</sub> R | 5'- TGGTGTACTTCAACTTCTG -3'<br>5'- GATCTTGGCGTAGATGGC -3'            | 60°          | AY772413  |
| A <sub>3</sub> R  | 5'- GGTGAAGTGCCAGAAGTTGTG -3'<br>5'- AGCATAGACGATAGGGTTCATCAT -3'    | 60°          | AY772414  |
| TNF- $\alpha$     | 5'- TGACCACCACCAAGAATT -3'<br>5'- TGTTCGAAGTATTCGATTG -3'            | 60°          | NM_214022 |
| GAPDH             | 5'- TCGGAGTGAACGGATTG -3'<br>5'- CCTGGAAGATGGTGATGG -3'              | 59°          | AF017079  |
| HPRT1             | 5'- CCGAGGATTGGAAAAGGT -3'<br>5'- CTATTTCTGTTCAAGTCTTGTATGT -3'      | 60°          | DQ178126  |
| TBP               | 5'- GATGGACGTTCCGTTTAGG -3'<br>5'- AGCAGCACAGTACGAGCAA -3'           | 59°          | DQ178129  |

Primer pair used for housekeeping and target genes in Real Time experiments. A<sub>1</sub>R = adenosine 1 receptor A<sub>2A</sub>R = adenosine 2A receptor, A<sub>2B</sub>R = adenosine 2B receptor, A<sub>3</sub>R = adenosine 3 receptor, TNF- $\alpha$  = tumor necrosis factor -  $\alpha$ , GAPDH = Glycerinaldehyde 3-phosphate dehydrogenase, HPRT1 = Hypoxanthine PhosphoRibosylTransferase 1, TBP = TATA-Binding protein.  
doi:10.1371/journal.pone.0047011.t001

## Data Analysis

The geometric mean of the three most stably expressed genes (GAPDH, HPRT1, TBP), selected in previous studies [8,19], was confirmed in this new set of experiments where C, PS and OS samples were considered as a single system which was used for normalization of each gene mRNA expression in the samples.

The relative quantification was performed by  $\Delta\Delta C_t$  method using iQ5 Software (BioRad, Hercules, CA, USA).

Differences between more than two independent groups were analyzed by Fisher's test after ANOVA. The results were expressed as mean  $\pm$  SEM; p-value was considered significant when  $<0.05$ .

## Results

### Hemodynamic parameters

As shown in Table 2, after 3 weeks of pacing the animals showed an increased heart rate and a marked decrease in mean arterial pressure and LV end-systolic pressure.

**Table 2.** Hemodynamic parameters in controls and HF animals (after 21  $\pm$  2 days of pacing).

|                   | Controls           | HF                 |            |
|-------------------|--------------------|--------------------|------------|
| HR, beats/min     | 92 $\pm$ 7.2       | 108.5 $\pm$ 8.64   | p < 0.0001 |
| LVEDP, mmHg       | 7.4 $\pm$ 0.85     | 21.5 $\pm$ 3.26    | p = 0.0002 |
| MAP, mmHg         | 101.1 $\pm$ 10.7   | 81.8 $\pm$ 10.8    | p < 0.0001 |
| LVDP/dmax, mmHg/s | 2064.2 $\pm$ 115.9 | 1536.1 $\pm$ 151.1 | p < 0.0001 |
| LVESP, mmHg/s     | 116.1 $\pm$ 12.4   | 95.0 $\pm$ 8.25    | p < 0.0001 |

HR: heart rate, LVEDP: left ventricular end-diastolic pressure, MAP: mean arterial pressure, LVESP: left ventricular systolic pressure.  
doi:10.1371/journal.pone.0047011.t002

In all animals LV end diastolic pressure was at least 20 mmHg which was considered an index of severe, although not end-stage, HF.

### Cardiac MRI

At the end of the experimental protocol global LV ejection fraction was significantly reduced (35.9  $\pm$  3 vs. 76  $\pm$  2%, p < 0.05). In particular, LV end-systolic wall thickening (LVESWT), an index of regional contractile function, was significantly lower in the PS than in the OS (5.31  $\pm$  2.08 vs. 45.04  $\pm$  4.18, p < 0.001), indicating a severe regional pacing-induced contractile impairment. The LVRUSI was more reduced in the PS than in the OS (9.1  $\pm$  1 vs. 14.6  $\pm$  1.2%, p < 0.05), suggesting a significant myocardial hypoperfusion in the abnormally contracting area. No changes between LV PS and OS were reported for gadolinium-delayed enhancement, suggesting lack of significant tissue fibrosis.

### ARs, and TNF- $\alpha$ mRNA expression in PS and OS

In Fig. 1 the mean values obtained for A<sub>1</sub>R, A<sub>2A</sub>R, A<sub>2B</sub>R and A<sub>3</sub>R mRNA expression at PS, OS in HF animals and in C, are reported.

After 3 weeks of pacing higher levels of expression for each ARs were observed in PS except for A<sub>1</sub>R; for this subtype a significant mRNA reduction was found both in PS and in OS (p < 0.0001, respectively).

Higher levels of A<sub>1</sub>R, A<sub>2B</sub>R and A<sub>3</sub>R although not statistically significant were observed in PS as compared to OS. A<sub>2A</sub>R were almost comparable in the two sites.

TNF- $\alpha$  mRNA expression resulted similar in PS (6.3  $\pm$  2.4) and in OS (5.9  $\pm$  2.7) in HF minipigs, although higher than in the control group (3.4  $\pm$  1.5).

A very significant correlation was also found between overall A<sub>2B</sub>R and A<sub>3</sub> (r = 0.88, p < 0.0001).

### Immunohistochemistry

To confirm mRNA expression of the AR receptors, myocardial A<sub>3</sub> expression was assessed by immunohistochemistry.

As showed in Fig. 2 A<sub>3</sub>R immunohistochemical expression reaction (brown) was greater in PS (+++) than OS (++) and C (+) while the negative control was not immunoreactive (-).

## Discussion

In a previous study [8] performed in the same experimental model, an up-regulation of ARs in the left ventricle was found, as compared to controls, after 3 weeks of sustained high frequency LV pacing. While 7-5-2 fold increase was observed for A<sub>2B</sub>R, A<sub>3</sub>R and A<sub>2A</sub>R, with respect to the control group, A<sub>1</sub>R showed a slight increase; however, whether the myocardial expression of ARs would relate to the regional distribution of LV contractile dysfunction was not assessed.

In the current investigation the ARs mRNA expression was evaluated in the PS and in the OS of an animal model of non-ischemic dilated cardiomyopathy induced by LV pacing at high frequency as well as in a group of healthy animals. ARs expression in the regions of interest of the LV myocardium was assessed and a receptor up-regulation in the PS was found compared to OS. The trend of ARs mRNA expression previously determined [8] in control group vs. HF animals in the left ventricle was confirmed except for A<sub>1</sub>R mRNA which resulted significantly reduced both in PS and in OS, probably due to the larger number of studied animals.

ARs are known to be activated by interstitial physiological or supraphysiological concentration levels of adenosine [5]. As

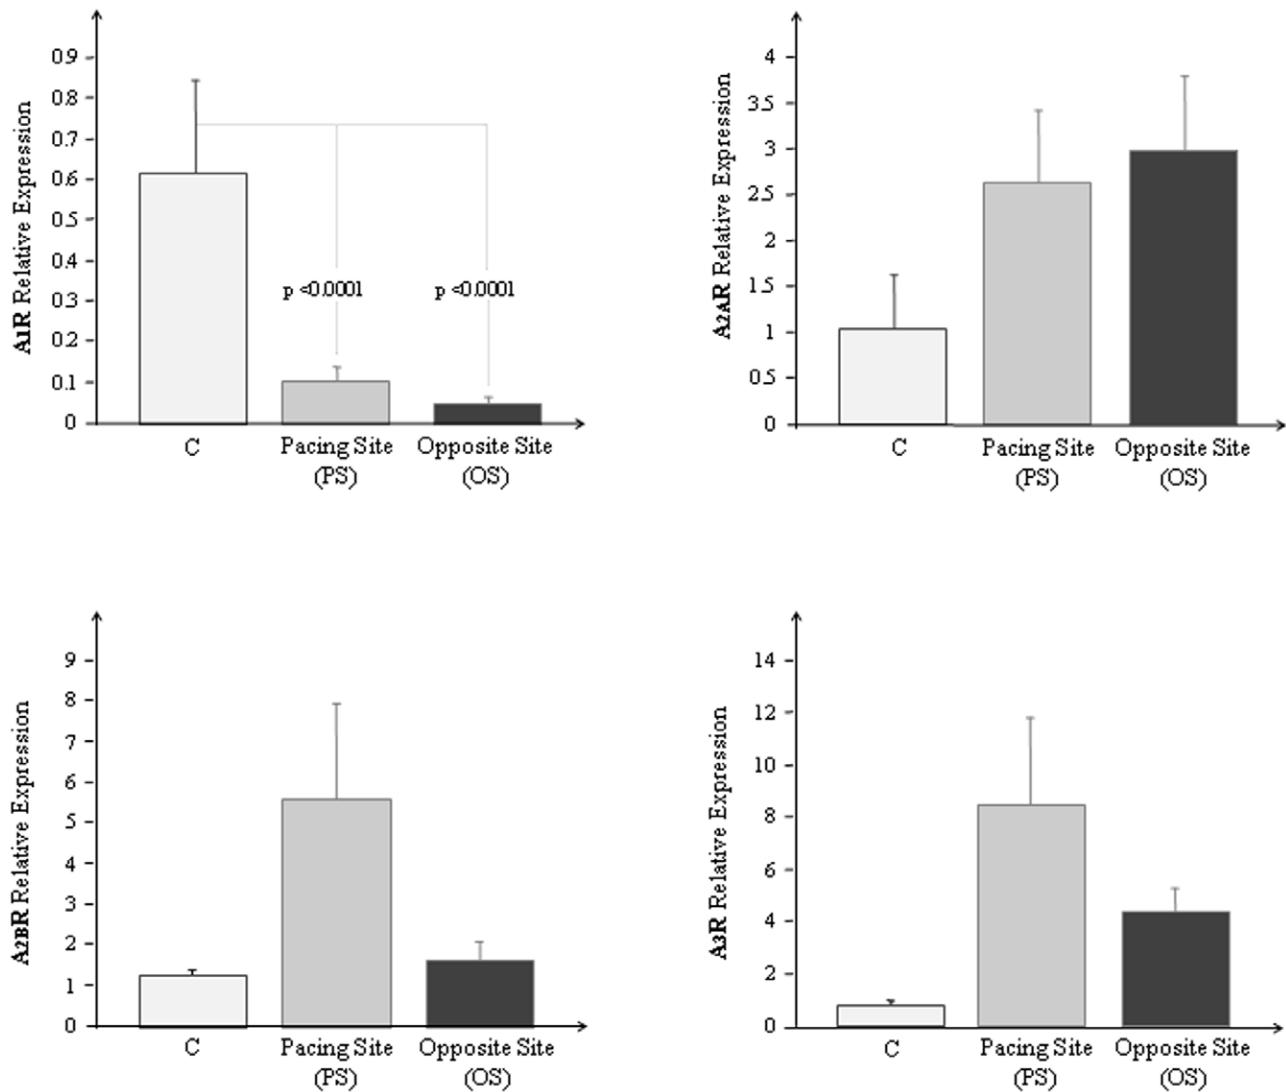

**Figure 1. Adenosine receptors mRNA expression in left ventricle of normal and HF minipigs.** a) A<sub>1</sub>R, b) A<sub>2A</sub>R, c) A<sub>2B</sub>R and d) A<sub>3</sub>R mRNA expression measured by Real Time PCR in the left ventricle of controls (C) (white bars), in the anterior left ventricular wall (PS) (grey bars) and in the opposite site (OS) (black bars) of HF minipigs. The result were expressed as mean  $\pm$  SEM. doi:10.1371/journal.pone.0047011.g001

observed in different models exposed to varying concentrations of an A<sub>1</sub>R agonist, a rapid internalization of A<sub>1</sub>R is possible, leading to receptor desensitization [20,21].

The lower level of A<sub>1</sub>R observed in this study both in PS and OS after HF induction could be due to a desensitization of A<sub>1</sub>R caused by higher adenosine concentration. These results are in line with a previous study in which agonist-induced cell surface A<sub>1</sub>R

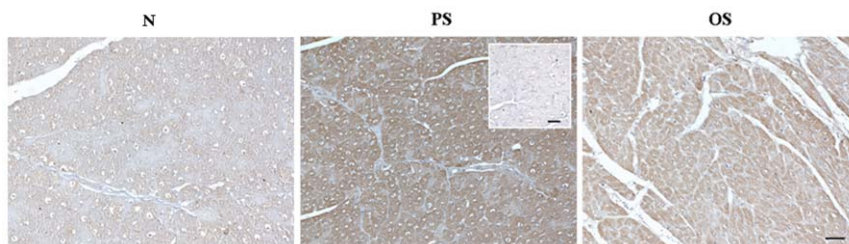

**Figure 2. A<sub>3</sub>R immunohistochemical expression.** Immunohistochemical staining of A<sub>3</sub>R in the left ventricle of controls (C), in the anterior left ventricular wall pacing site (PS) and in the opposite site (OS) of HF minipigs. Negative control was inserted in the right side of PS image. Scale bar: 50  $\mu$ m. doi:10.1371/journal.pone.0047011.g002

aggregation with subsequent receptor desensitization and internalization was demonstrated [20].

The reduction in pump function after high frequency ventricular pacing is due not only to tachycardia but also to the abnormal electrical activation which determines the loss of the normal apex-to-base sequence of activation, as seen during normal sinus rhythm, leading to an asynchronous contraction of the different parts of the left ventricular myocardium [22–24].

After a few weeks of continuous high-frequency pacing, myocardial perfusion was markedly impaired, especially in regions with a more pronounced contractile derangement.

The semi-quantitative MRI assessment showed higher perfusion levels in the OS relative to the PS while no differences could be found in terms of tissue fibrosis between LV PS and OS by gadolinium-delayed enhancement techniques.

Our findings provide the first evidence of regional differences in ARs mRNA expression in a dysfunctioning heart with LV asynchronous contraction.

Although the lack of statistically significant values may limit the strength of the results, the trend observed at the two LV walls and, mostly, the influence of pacing on local perfusion and contractility, together with the differences with controls, may provide important information on local receptor expression in this widely used experimental model.

The long-term asynchrony and impairment in LV contractile performance seem to exert a positive feedback on the transcription of genes coding for myocardial adenosine receptors not associated with collagen synthesis.

Adenosine protects the heart during ischemia via the activation of A<sub>1</sub>R and A<sub>3</sub>R [25], increasing coronary blood flow via the activation of A<sub>2A</sub>R, improving contractile performance and inhibiting cytokine production and inflammatory response [26,27].

## References

- Fredholm BB (2007) Adenosine, an endogenous distress signal, modulates tissue damage and repair. *Cell Death Differ* 14: 315–323.
- Shryock JC, Belardinelli L (1998) Adenosine and adenosine receptors in the cardiovascular system: biochemistry, physiology, and pharmacology. *Am J Cardiol* 79: 2–10.
- Gorlach A (2005) Control of adenosine transport by hypoxia. *Circ Res* 97: 1–3.
- Karsai D, Zsuga J, Juhasz, Dér P, Szentmiklósi AJ, et al. (2006) Effect of nucleoside transport blokade on the interstitial adenosine level characterized by a novel method in guinea pig atria. *J Cardiovasc Pharmacol* 47:103–109.
- Robin E, Sabourin J, Benoit R, Pedretti S, Raddatz E (2011) Adenosine A1 receptor activation is arrhythmogenic in the developing heart through NADPH oxidase/ERK- and PLC/PKC-dependent mechanisms. *J Mol Cell Cardiol* 51: 945–954.
- Fredholm BB, Ijzerman AP, Jacobson KA, Klotz KN, Linden J (2001) International Union of Pharmacology, XXV: nomenclature and classification of adenosine receptors. *Pharmacol Rev* 53: 527–552.
- Ralevic V, Burnstock G (2002) Receptors for purines and pyrimidines. *Pharmacol Rev* 50: 413–492.
- Del Ry S, Cabiati M, Martino A, Simioniuc A, Morales MA, et al. (2011) Adenosine receptor mRNA expression in normal and failing minipig hearts. *J Cardiovasc Pharmacol* 58: 149–156.
- Lionetti V, Guiducci L, Simioniuc A, Aquaro GD, Simi C, et al. (2007) Mismatch between uniform increase in cardiac glucose uptake and regional contractile dysfunction in pacing-induced heart failure. *Am J Physiol Heart Circ Physiol* 293: H2747–H2756.
- Grines CL, Bahore TM, Boudoulas H, Olson S, Shafer P, et al. (1989) Functional abnormalities in isolated left bundle branch block. The effect of intraventricular asynchrony. *Circulation* 79: 845–853.
- Gemignani V, Bianchini E, Fata F, Lionetti V, Campan M, et al. (2010) Transthoracic sensor for non invasive assessment of left ventricular contractility: validation in a minipig model of chronic heart failure. *Pacing Clin Electrophysiol* 33: 795–803.
- Lionetti V, Aquaro GD, Simioniuc A, Di Cristofano C, Forini F, et al. (2009) Severe mechanical dyssynchrony causes regional hibernation-like changes in pigs with nonischemic heart failure. *J Card Fail* 15: 920–928.
- Prinzen FW, Hunter WC, Wyman BT, McVeigh ER (1999) Mapping of regional myocardial strain and work during ventricular pacing: experimental study using magnetic resonance imaging tagging. *J Am Coll Cardiol* 33:1735–1742.
- Prescimone T, Lionetti V, Caselli C, Aquaro GD, Cabiati M, et al. (2011) Severity of regional myocardial dysfunction is not affected by cardiomyocyte apoptosis in non-ischemic heart failure. *Pharmacol Res* 63: 207–215.
- Del Ry S, Cabiati M, Lionetti V, Colotti C, Maltinti M, et al (2007) Sequencing and cardiac expression of natriuretic peptide receptor 2 (NPR-B) in Sus Scrofa. *Peptides* 28:1390–1396.
- Del Ry S, Cabiati M, Lionetti V, Emdin M, Recchia FA, et al. (2008) Expression of C-type natriuretic peptide and of its receptor NPR-B in normal and failing heart. *Peptides* 29: 2008–2015.
- Del Ry S, Cabiati M, Lionetti V, Simioniuc A, Caselli C, et al. (2009) Asymmetrical myocardial expression of natriuretic peptides in pacing-induced heart failure. *Peptides* 30:1710–1713.
- Del Ry S, Cabiati M, Vozzi F, Battolla B, Caselli C, et al. (2011) Expression of C-type natriuretic peptide and its receptor NPR-B in cardiomyocytes. *Peptides* 32:1713–1718.
- Martino A, Cabiati M, Campan M, Prescimone T, Minocci D, et al. (2011) Selection of reference genes for normalization of Real-Time PCR data in minipig Heart Failure model and evaluation of TNF- $\alpha$  mRNA expression. *J Biotechnol* 153: 92–99.
- Ciruela F, Saura C, Canela EI, Mallol J, Lluís C, et al. (1997) Ligand-induced phosphorylation, clustering, and desensitization of A1 adenosine receptors. *Mol Pharmacol* 52: 788–797.
- Klaasse EC, Ijzerman AP, de Grip WJ, Beukers MW (2008) Internalization and desensitization of adenosine receptors. *Purinergic Signal* 4: 21–37.
- Ojaimi C, Qanud K, Hintze TH, Recchia FA (2007) Altered expression of a limited number of genes contributes to cardiac decompensation during chronic ventricular tachypacing in dogs. *Physiol Genom* 29: 76–83.
- Sweeney MO, Prinzen FW (2008) Ventricular pump function and pacing: physiological and clinical integration. *Circ Arrhythm Electrophysiol* 1: 127–39.
- Prinzen FW, Peschar M (2002) Relation between the pacing induced sequence of activation and left ventricular pump function in animals. *Journal of Pacing and Clinical Electrophysiol* 25: 484–498.
- Kitakaze M, Hori M, Kamada T (2002) Role of adenosine and its interaction with alpha adrenoceptor activity in ischaemic and reperfusion injury of the myocardium. *Cardiovasc Res* 27: 18–27.

In this study A<sub>1</sub>R, A<sub>2B</sub>R and A<sub>3</sub>R mRNA expression resulted higher in the PS than in the OS; the lower myocardial levels of ARs in OS could be in tune with the presence of better myocardial contraction and perfusion in this region as compared to PS.

These results are confirmed by immunohistochemistry and are in agreement with a previous study where higher ATP consumption and better mechanical activity in the OS of a failing heart was observed [28].

The higher TNF- $\alpha$  levels found in HF animals as compared with controls support the hypothesis of the interaction between adenosine and TNF- $\alpha$  in the initiation, maintenance and amplification of the inflammatory response [8].

This model, devoid of possible confounding effects of pharmacological therapy, allowed the evaluation of alterations of ARs in the setting of LV dysfunction and provided new data on the role of these receptors in relation to pacing-induced abnormalities in myocardial perfusion and contraction. These results suggest a possible therapeutic role of adenosine in patients with heart failure and dyssynchronous contraction. Chronic dyssynchrony profoundly affects [10,29] and accelerates the progression of heart failure and represents the rationale of resynchronization therapy to reduce the burden of incoordinate LV contraction [30]. It could be hypothesized that in HF patients with normal coronary arteries and LV dyssynchrony, adenosine might represent a possible therapeutic approach to slow down or even revert the development of heart failure.

## Author Contributions

Conceived and designed the experiments: SDR. Performed the experiments: MC VL GDA AM LM. Analyzed the data: SDR MC AM MAM. Contributed reagents/materials/analysis tools: SDR MC VL AM GDA LM MAM. Wrote the paper: SDR MAM.

26. Talukder MA, Morrison RR, Ledent C, Mustafa SJ (2003) Endogenous adenosine increases coronary flow by activation of both A<sub>2A</sub> and A<sub>2B</sub> receptors in mice. *J Cardiovasc Pharmacol* 41: 562–70.
27. Monahan TS, Sawmiller DR, Fenton RA, Dobson JG Jr (2000) Adenosine A<sub>2a</sub>-receptor activation increases contractility in isolated perfused hearts. *Am J Physiol Heart Circ Physiol* 279: H1472–H1481.
28. Lionetti V, Aquaro GD, Simionuc A, Di Cristofano C, Forini F, et al. (2009) Severe mechanical dyssynchrony causes regional hibernation-like changes in pigs with nonischemic heart failure. *J Card Fail* 15: 920–928.
29. Iuliano S, Fisher SG, Karasik PE, Fletcher RD, Singh SN (2002) QRS duration and mortality in patients with congestive heart failure. *Am Heart J* 143: 1085–1091.
30. Baker CM, Christopher TJ, Smith PF, Langberg JJ, Delurgio DB, et al. (2002) Addition of a left ventricular lead to conventional pacing systems in patients with congestive heart failure: feasibility, safety, and early results in 60 consecutive patients. *Pacing Clin Electrophysiol* 25: 1166–1171.
